# Supplementary material for: The optical properties of low infrared transmittance WO3−x nanocrystal thin films prepared by DC magnetron sputtering under different oxygen ratios
Source: Royal Society of Chemistry journal article supplement (doi:10.1039/c5ra09518b), 2015-01-01
Supplement: c5ra09518b1.pdf [file c5ra09518b1.pdf]

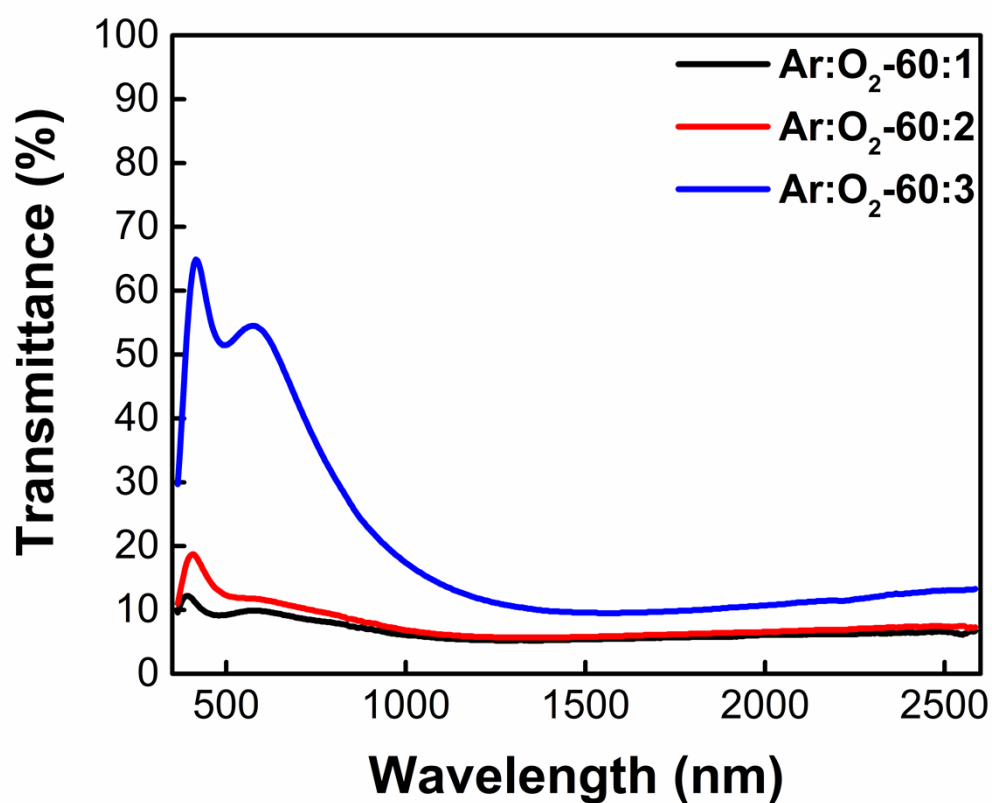

Fig.1 the transmittance spectrum of low oxygen ratio samples.

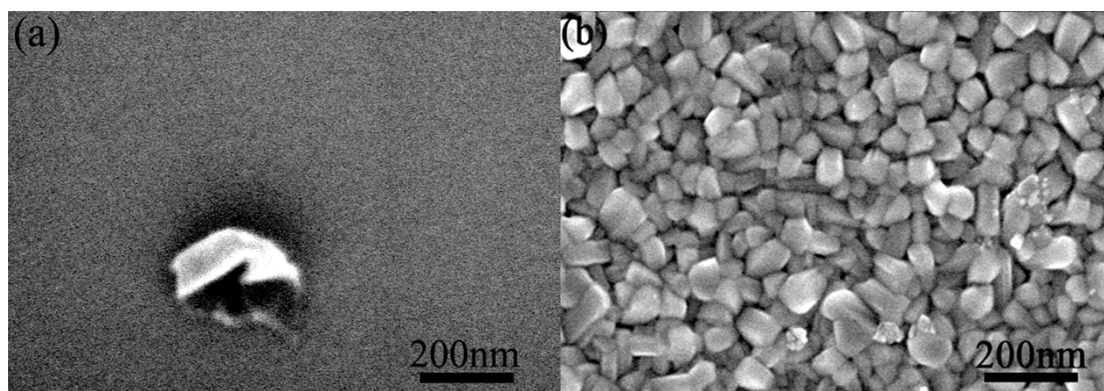

Fig. 2 (a) the top view of S4 before annealing, (b) the top view of S4 after annealing.

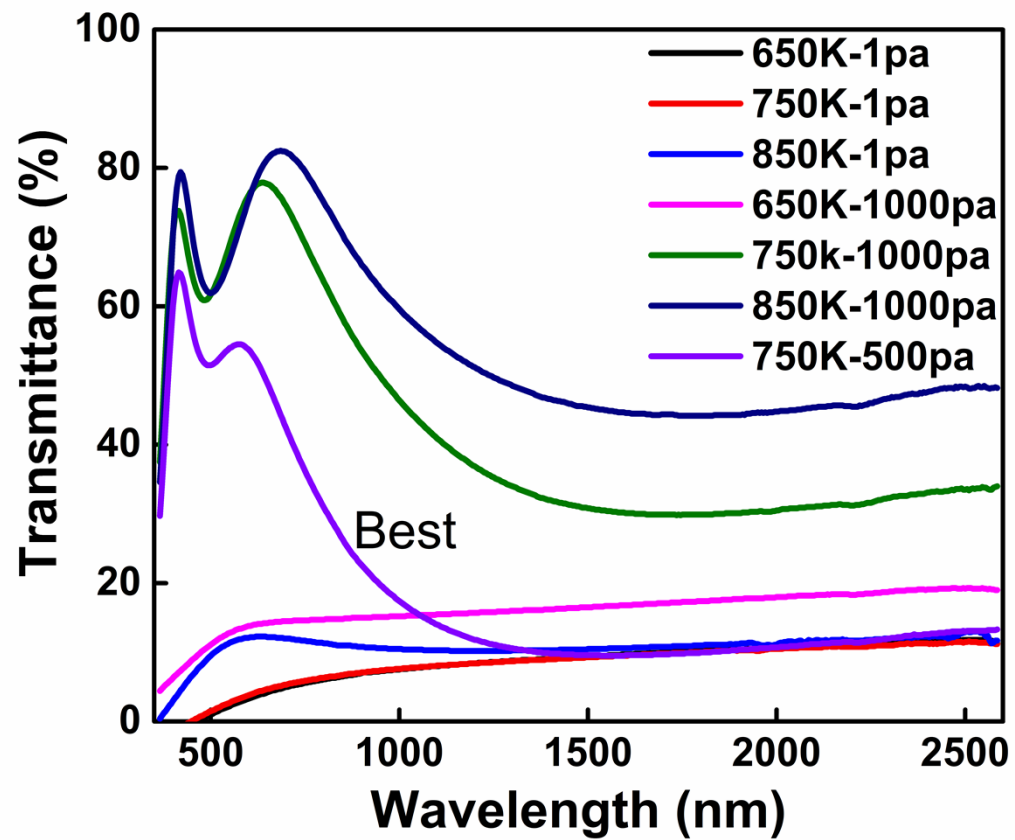

Fig.3 the transmittance spectrums with respect to pressure and temperature during annealing process.
